# Supplementary material for: Mediator free cholesterol biosensor based on self-assembled monolayer platform
Source: Royal Society of Chemistry journal article supplement (doi:10.1039/c1an15196g), 2011-12-02
Supplement: c1an15196g.pdf [file c1an15196g.pdf]

## Supplementary Data

### Response Studies of ChOx/4-ATP/Au and ChEt-ChOx/4-ATP/Au bioelectrodes by UV-visible Spectrophotometer

UV-visible experiments were carried out for free and total cholesterol sensing and to determine the thermal stability and shelf-life of ChOx/4-ATP/Au and ChEt-ChOx/4-ATP/Au bioelectrodes. The bioelectrodes ( $0.5 \times 1.0 \text{ cm}^2$ ) were dipped in 3 ml PBS solution containing 20  $\mu\text{l}$  of HRP (1 mg/ml), 20  $\mu\text{l}$  of o-dianisidine dye (1%), and 100  $\mu\text{l}$  of analyte (cholesterol or cholesteryl oleate solution) and were kept for about 2 min. The variation in the absorbance value was measured at 500 nm after 2 min of incubation of the respective bioelectrodes.

The biochemical reaction occurring at ChOx/4-ATP/Au bioelectrode in the photometric studies can be expressed as:

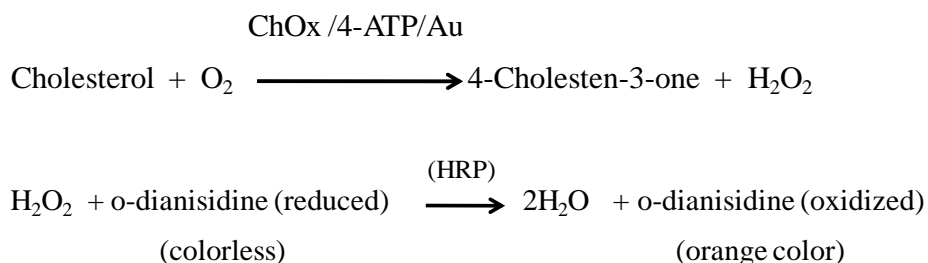

The biochemical reaction occurring at ChEt-ChOx/4-ATP/Au bioelectrode can be expressed as:

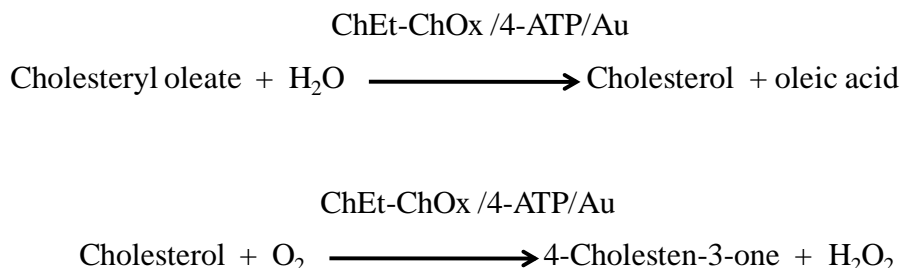

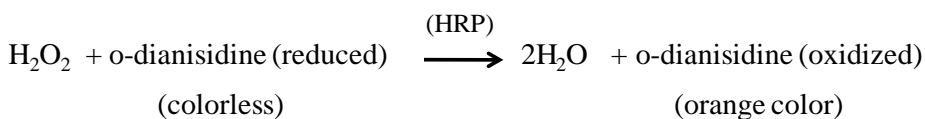

### Thermal stability of ChOx/4-ATP/Au and ChEt-ChOx/4-ATP/Au bioelectrodes

Fig. 2S (a) & (b) shows variation of observed difference between the initial and final absorbance value measured at 500 nm after 2 min of incubation of ChOx/4-ATP/Au and ChEt-ChOx/4-ATP/Au bioelectrodes at temperatures 15 to 55°C for a fixed analyte concentration of 200 mg/dl . It was observed that the value of absorbance increases with increasing temperature up to ~50 °C, whereafter it shows a decrease, indicating the denaturation of enzyme at temperatures >50 °C. The obtained results show that 4-ATP SAM based cholesterol sensor is extremely stable at temperatures more than normal body temperature (37°C).

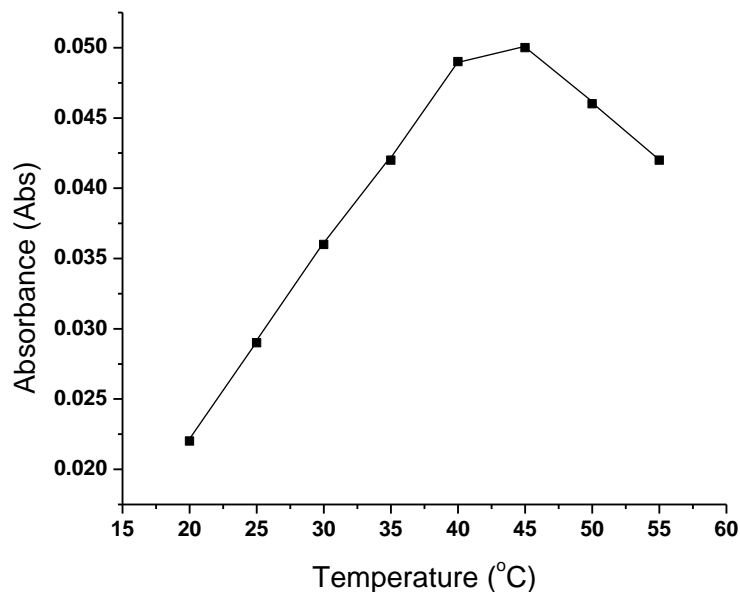

**Fig. 2S. (a).** Photometric response of ChOx/4-ATP/Au bioelectrode as a function of temperature

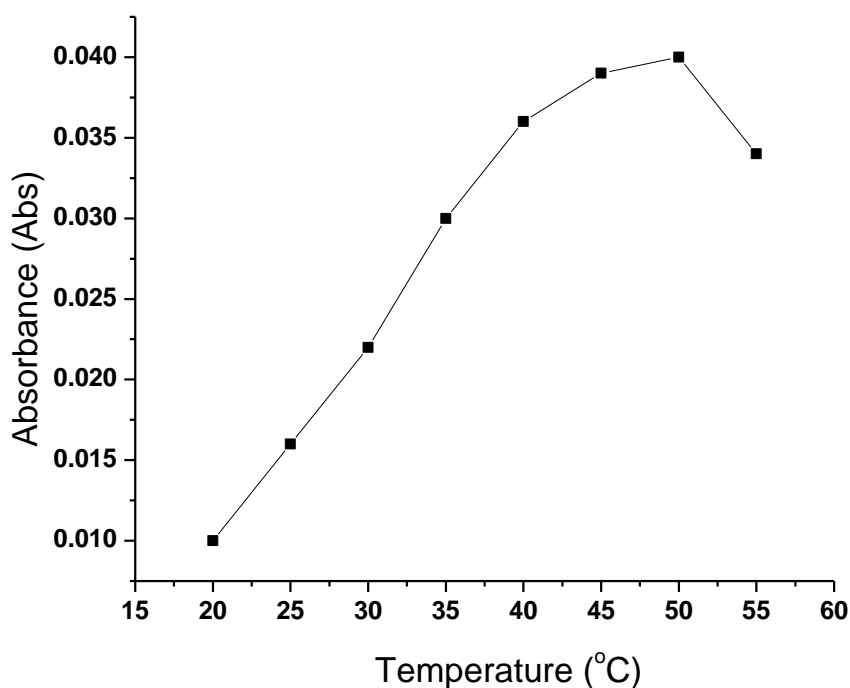

**Fig. 2S. (b).** Photometric response of ChEt-ChOx/4-ATP/Au bioelectrode as a function of temperature.

### Activation energy

The variation of  $\ln(\text{Absorbance})$  as a function of inverse of temperature for ChOx/4-ATP/Au and ChEt-ChOx/4-ATP/Au bioelectrodes is shown in Fig. 3S (a) and 3S (b). The temperature dependence of absorbance shows an Arrhenius behavior and can be expressed as:

$$A = A_o \exp\left[\frac{-\Delta E}{RT}\right] \quad (\text{Eq. 4})$$

where  $A$  is the absorbance,  $R$  is gas constant,  $T$  is temperature (in K),  $A_o$  is pre-exponential factor and  $\Delta E$  is the activation energy (J/mole). Activation energy is defined as the minimum amount of energy required for an enzymatic reaction to occur and its value can be estimated from

the slope of Arrhenius plot. The value of the activation energy for ChOx/4-ATP/Au and ChEt-ChOx/4-ATP/Au bioelectrodes calculated using the slope of Arrhenius plot (Fig. 3S), i.e., plot of  $\ln(\text{absorbance})$  with inverse of absolute temperature, has been found to be 30.2 kJ/mol and 42.5 kJ/mol, respectively in the lower temperature range.

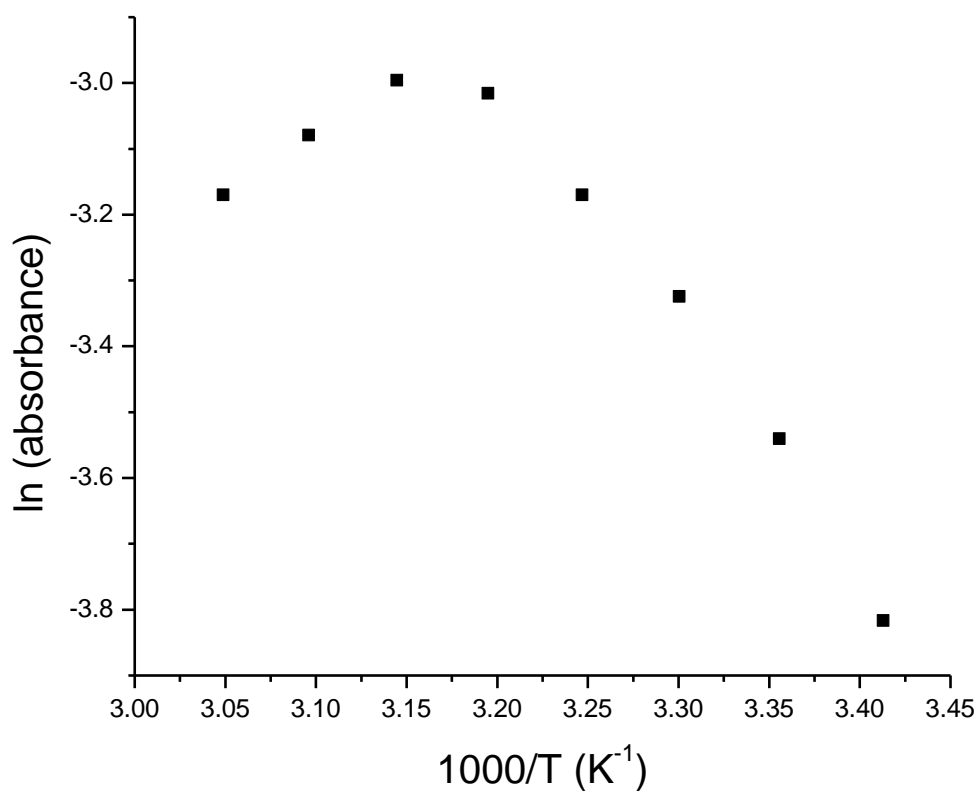

**Fig. 3S. (a).** Plot of  $\ln(\text{absorbance})$  vs inverse of temperature for ChOx/4-ATP/Au bioelectrode

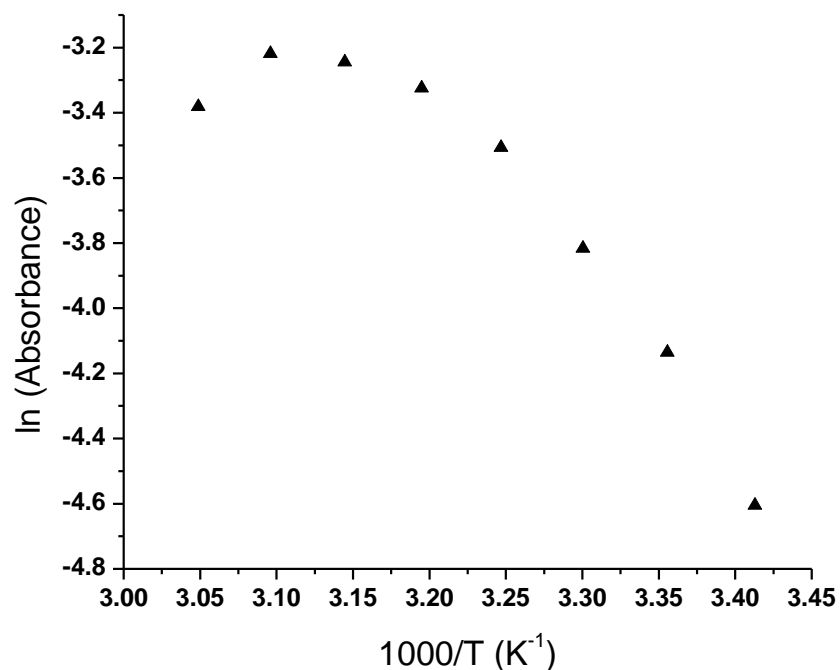

**Fig. 3S. (b).** Plot of ln (absorbance) vs inverse of temperature for ChEt0ChOx/4-ATP/Au bioelectrode.

### Shelf-life studies

UV–visible experiments were also carried out at regular intervals of a week to investigate the shelf-life of the prepared enzyme electrodes (data not shown). The enzyme electrodes were stored at 4°C when not in use. Activity measurements were done at 30°C with 200 mg/dl concentrations of cholesterol and cholesteryl oleate. The weekly absorbance measurements reveal that ChOx/4-ATP/Au and ChEt-ChOx/4-ATP/Au bioelectrodes are stable for about 4 months with more than 90% of the initial activity.
